# Supplementary material
Source: HighWire-hosted journal article supplement (https://jnm.snmjournals.org/highwire/filestream/102177/field_highwire_adjunct_files/0/254623_Supplemental_Data.pdf)
Supplement: 254623_Supplemental_Data.pdf [file 254623_Supplemental_Data.pdf]

**Supplemental Table 1.** Testing of the CNN performance

|                                      | DSC    |      |      | HD (mm) |      |       | ASSD (mm) |      |      | Computation time (sec) |       |       |
|--------------------------------------|--------|------|------|---------|------|-------|-----------|------|------|------------------------|-------|-------|
|                                      | Median | Min  | Max  | Median  | Min  | Max   | Median    | Min  | Max  | Median                 | Min   | Max   |
| <b>Internal testing 68Ga-PSMA-11</b> | 0.84   | 0.32 | 0.95 | 4.03    | 1.42 | 10.0  | 0.61      | 0.28 | 1.97 | 6.28                   | 5.47  | 7.66  |
| <b>Internal testin 18F-PSMA-1007</b> | 0.81   | 0.28 | 0.93 | 5.0     | 1.41 | 8.49  | 0.5       | 0.26 | 1.82 | 6.00                   | 3.53  | 9.2   |
| <b>External testing 68Ga-PSMA-11</b> |        |      |      |         |      |       |           |      |      |                        |       |       |
| <b>No resampling</b>                 | 0.78   | 0.11 | 0.89 | 12.57   | 1.43 | 32.9  | 0.62      | 0.27 | 4.03 | 1.93                   | 0.27  | 2.02  |
| <b>B-spline interpolation</b>        | 0.82   | 0.39 | 0.92 | 5.83    | 2.45 | 22.36 | 0.55      | 0.32 | 2.1  | 27.79                  | 10.54 | 30.91 |
| <b>Tri-linear interpolation</b>      | 0.83   | 0.32 | 0.93 | 4.12    | 2.01 | 22.36 | 0.46      | 0.28 | 1.61 | 23.32                  | 10.55 | 26.37 |
| <b>Gaussian interpolation</b>        | 0.81   | 0.04 | 0.94 | 7.35    | 2.24 | 20.05 | 0.55      | 0.19 | 3.72 | 25.13                  | 10.49 | 28.3  |

Abbreviations: Dice-Sørensen coefficient (DSC), Hausdorff distance (HD) and average symmetric surface distance (ASSD).

**Supplemental table 2. Impact of different clinical parameters on DSC (cut-off: median value of pooled cohorts).**

| Parameter                                                | HR    | 95% CI |        | p value |
|----------------------------------------------------------|-------|--------|--------|---------|
|                                                          |       | lower  | upper  |         |
| initial PSA (20 ng/ml vs. >20 ng/ml)                     | 1.286 | 0.343  | 4.816  | 0.709   |
| Gleason score (6 + 7a vs. ≥7b)                           | 3.733 | 0.78   | 17.88  | 0.099   |
| cT stage (2 vs. 3)                                       | 2.489 | 0.616  | 10.056 | 0.201   |
| Localization (lower half vs. upper half vs. both halves) | 1.429 | 0.622  | 3.284  | 0.401   |

Testing cohorts 1 and 3 were pooled. The best performing resampling step (tri-linear interpolation) in terms of DSC in cohort 3 was used for analyses. The median DSC was used as cut-off point.
